# Supplementary figures and images for: Urine LOX-1 and Volatilome as Promising Tools towards the Early Detection of Renal Cancer
Source: MDPI journal article supplement (doi:10.3390/cancers13164213), 2021-08-21

IB:Anti LOX-1(Abcam, ab60178)

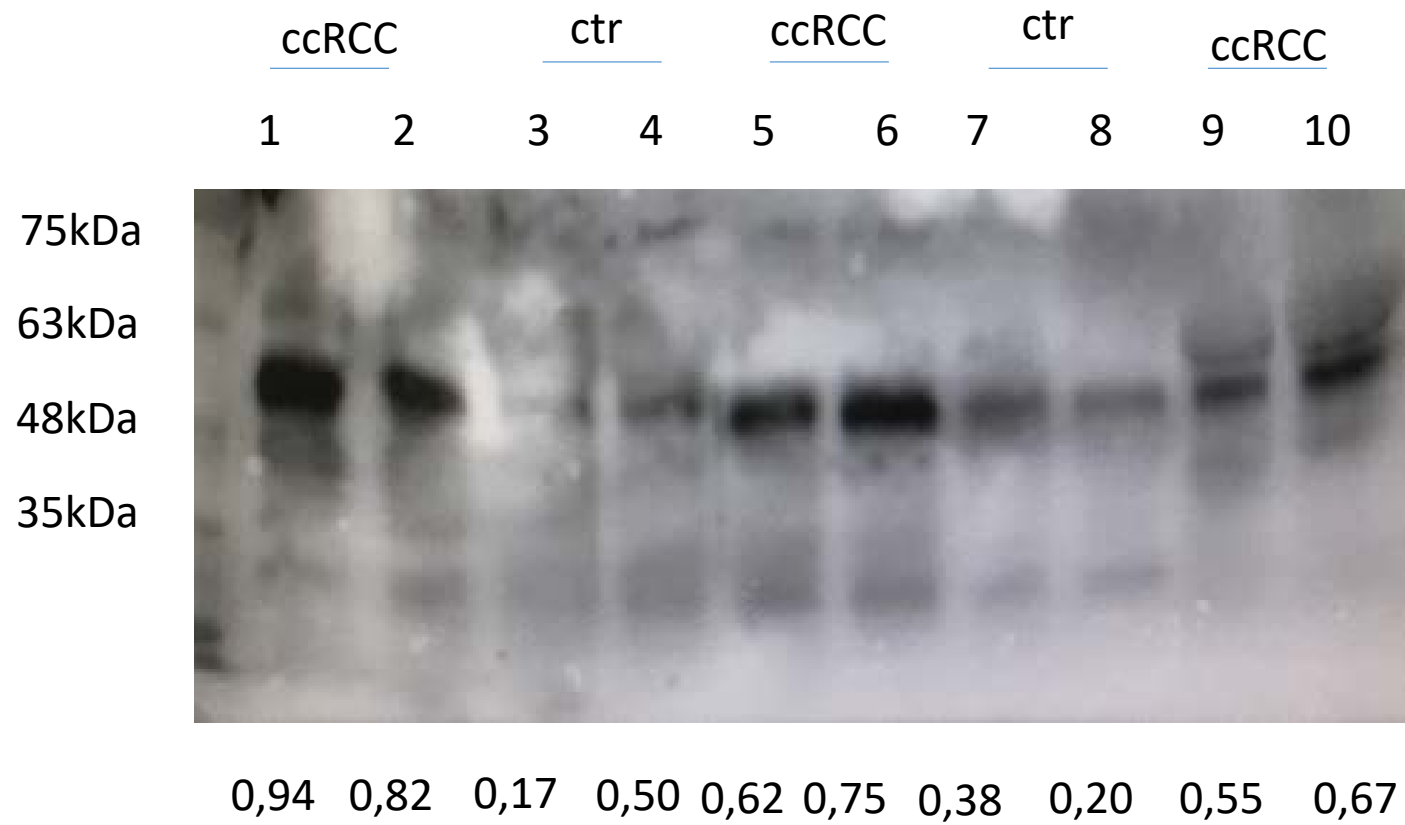

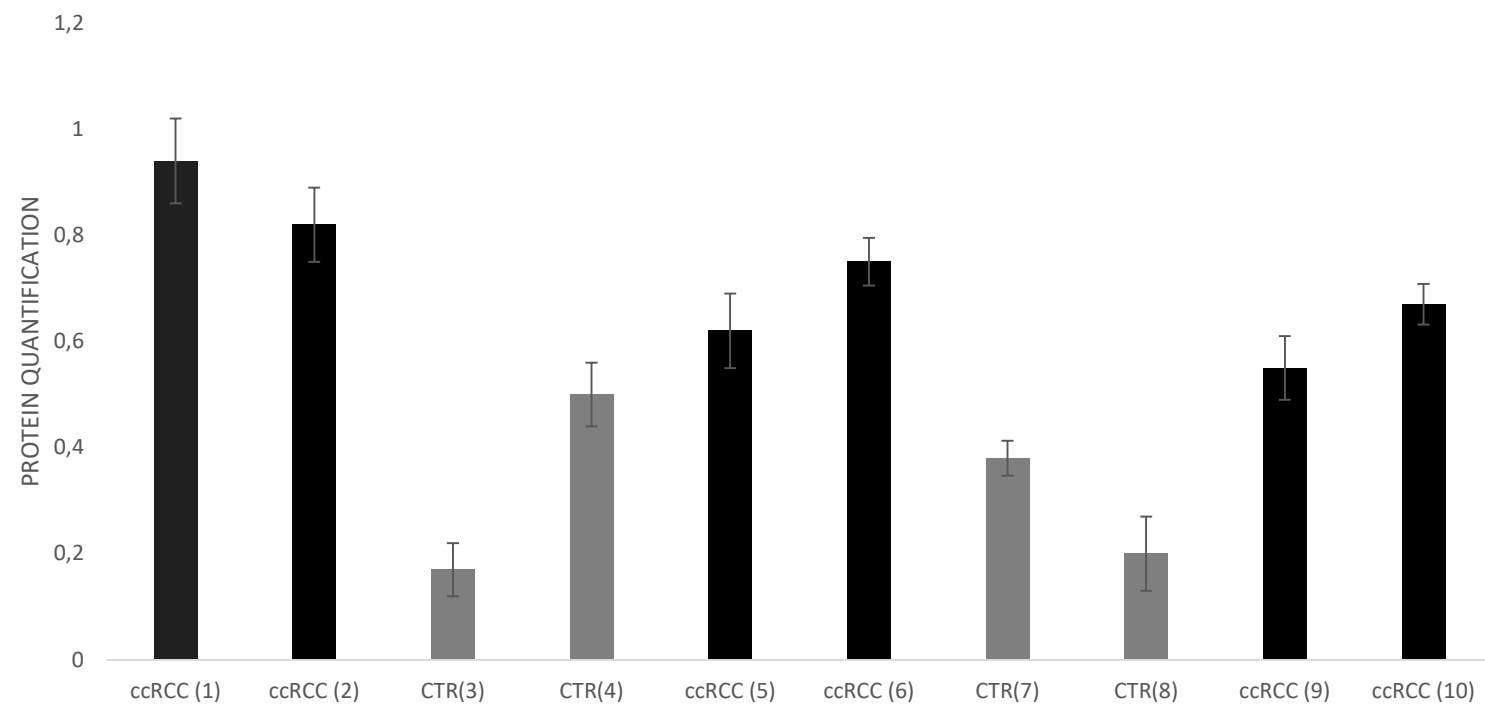

Supplement: s1 [file s1]
